# Supplementary material for: Genomic and Metabolic Diversity of Marine Group I Thaumarchaeota in the Mesopelagic of Two Subtropical Gyres
Source: PubMed Central journal article supplement (PMC3990693; doi:10.1371/journal.pone.0095380), 2014-04-17
Supplement: pone.0095380.s004.pdf [file pone.0095380.s004.pdf]

**Table S1.** PCR primers and conditions for screening of archaeal single amplified genomes (SAGs).

| Primer                            | Sequence (5' → 3')      | Annealing temp (°C) | Gene        | Metabolic process | Reference                    |
|-----------------------------------|-------------------------|---------------------|-------------|-------------------|------------------------------|
| <b>SSU rRNA PCR primers</b>       |                         |                     |             |                   |                              |
| parch_519F                        | CAGCMGCCGCGGTAA         | 50                  | SSU rRNA    | NA                | Ovreas <i>et al.</i> , 1997  |
| Arch_915R                         | GTGCTCCCCCGCCAATTCCT    |                     |             |                   | DeLong, 1992                 |
| Arch_345F                         | CCTAYGGGGYGCASCAG       | 57                  | SSU rRNA    | NA                | Gantner <i>et al.</i> , 2010 |
| Arch_1000R                        | GGCCATGCACYWCYTCTC      |                     |             |                   |                              |
| <b>Metabolic gene PCR primers</b> |                         |                     |             |                   |                              |
| Arch-amoAF                        | STAATGGTCTGGCTTAGACG    | 50                  | <i>amoA</i> | Ammonia oxidation | Francis <i>et al.</i> , 2005 |
| Arch-amoAR                        | GCGGCCATCCATCTGTATGT    |                     |             |                   |                              |
| NirKMF                            | CCWGGWCCAACHYTDAGA      | 50                  | <i>nirK</i> | Nitrite reduction | This study                   |
| NirkMR                            | ATTTCWCCDACAAYRTG       |                     |             |                   |                              |
| nifHF                             | GGHAARGGHGGHATHGGNAARTC | 55                  | <i>nifH</i> | Nitrogen fixation | Mehta <i>et al.</i> , 2003   |
| nifHR                             | GGCATNGCRAANCCVCCRCANAC |                     |             |                   |                              |

**References:**

- Ovreas L, Forney L, Daae F, Torsvik V (1997) Distribution of bacterioplankton in meromictic Lake Saelenvannet, as determined by denaturing gradient gel electrophoresis of PCR-amplified gene fragments coding for 16S rRNA. *Appl Environ Microbiol* 63: 3367-3373.
- DeLong EF (1992) Archaea in coastal marine environments. *Proc Natl Acad Sci USA* 89: 5685-5689.
- Gantner S, Andersson AF, Alonso-Sáez L, Bertilsson S (2010) Novel primers for 16S rRNA-based archaeal community analyses in environmental samples. *J Microbiol Methods* 84: 12-18.
- Francis CA, Roberts KJ, Beman JM, Santoro AE, Oakley BB (2005) Ubiquity and diversity of ammonia-oxidizing archaea in water columns and sediments of the ocean. *Proc Natl Acad Sci USA* 102: 14683-14688.
- Mehta MP, Butterfield DA, Baross JA (2003) Phylogenetic diversity of nitrogenase (*nifH*) genes in deep-sea and hydrothermal vent environments of the Juan de Fuca Ridge. *Appl Environ Microbiol* 69: 960-970.
