# Supplementary material for: Genomic and Metabolic Diversity of Marine Group I Thaumarchaeota in the Mesopelagic of Two Subtropical Gyres
Source: PubMed Central journal article supplement (PMC3990693; doi:10.1371/journal.pone.0095380), 2014-04-17
Supplement: pone.0095380.s005.pdf [file pone.0095380.s005.pdf]

**Table S2.** Single amplified genomes (SAGs) comprising Marine Group I (MGI) Thaumarchaeota SSU rRNA phylotypes. Phylotypes are defined as sequences having  $\geq 99\%$  similarity.

| <b>Phylotype</b>   | <b>Station<sup>1</sup></b> | <b>SAG sequence<sup>2</sup></b> | <b>Accession no.</b> |          |
|--------------------|----------------------------|---------------------------------|----------------------|----------|
| <b>Phylotype-1</b> | SA                         | <b>AAA007-J08</b>               | HQ675763             |          |
| <b>Phylotype-2</b> | SA                         | AAA001-B06                      | HQ675728             |          |
|                    |                            | AAA001-C02                      | HQ675732             |          |
|                    |                            | AAA001-D14                      | HQ675733             |          |
|                    |                            | AAA001-I14                      | HQ675738             |          |
|                    |                            | AAA001-J17                      | HQ675740             |          |
|                    |                            | AAA003-E14                      | HQ675744             |          |
|                    |                            | AAA008-E23                      | HQ675781             |          |
|                    |                            | AAA003-G07                      | HQ675746             |          |
|                    |                            | <b>AAA008-J11</b>               | HQ675785             |          |
|                    | AAA008-M21                 | HQ675791                        |                      |          |
|                    | AAA008-N10                 | HQ675794                        |                      |          |
|                    | HOT                        | AAA288-B04                      | HQ675806             |          |
|                    |                            | AAA288-E04                      | HQ675823             |          |
|                    |                            | AAA288-G03                      | HQ675830             |          |
|                    |                            | AAA288-G06                      | HQ675832             |          |
|                    |                            | AAA288-G14                      | HQ675833             |          |
|                    |                            | AAA288-G19                      | HQ675834             |          |
|                    |                            | AAA288-J20                      | HQ675840             |          |
|                    |                            | <b>AAA288-K02</b>               | HQ675841             |          |
| <b>Phylotype-3</b> |                            | SA                              | AAA003-D11           | HQ675743 |
|                    |                            |                                 | AAA003-P19           | HQ675756 |
|                    | AAA007-C21                 |                                 | HQ675759             |          |
|                    | AAA007-M20                 |                                 | HQ675767             |          |
|                    | HOT                        | <b>AAA288-A08</b>               | HQ675803             |          |
|                    |                            | AAA288-D03                      | HQ675814             |          |
|                    |                            | AAA288-N06                      | HQ675847             |          |
|                    |                            | AAA288-P02                      | HQ675854             |          |
| <b>Phylotype-4</b> | SA                         | AAA001-L13                      | HQ675742             |          |
|                    |                            | AAA007-G17                      | HQ675762             |          |
|                    |                            | <b>AAA008-A20</b>               | HQ675774             |          |
|                    | HOT                        | AAA008-I15                      | HQ675784             |          |
|                    |                            | AAA288-A16                      | HQ675805             |          |
|                    |                            | AAA288-D06                      | HQ675816             |          |
|                    |                            | AAA288-K05                      | HQ675842             |          |
| AAA288-K20         | HQ675844                   |                                 |                      |          |
| <b>Phylotype-5</b> | SA                         | AAA001-D19                      | HQ675734             |          |
|                    |                            | AAA003-J13                      | HQ675753             |          |
|                    |                            | AAA003-O17                      | HQ675755             |          |

|     |                   |          |
|-----|-------------------|----------|
|     | AAA008-K15        | HQ675788 |
|     | AAA008-N14        | HQ675795 |
|     | <b>AAA008-P23</b> | HQ675800 |
| HOT | AAA240-K17        | HQ675801 |
|     | AAA288-A10        | HQ675804 |
|     | AAA288-B11        | HQ675808 |
|     | AAA288-C11        | HQ675810 |
|     | <b>AAA288-C17</b> | HQ675812 |
|     | AAA288-D04        | HQ675815 |
|     | AAA288-I17        | HQ675836 |
|     | AAA288-N08        | HQ675848 |
|     | AAA288-O22        | HQ675853 |
|     | AAA288-P18        | HQ675855 |

---

|                    |    |                   |          |
|--------------------|----|-------------------|----------|
| <b>Phylotype-6</b> | SA | <b>AAA008-L08</b> | HQ675790 |
|--------------------|----|-------------------|----------|

---

|                    |    |            |          |
|--------------------|----|------------|----------|
| <b>Phylotype-7</b> | SA | AAA001-A19 | HQ675727 |
|                    |    | AAA001-B14 | HQ675729 |
|                    |    | AAA001-B20 | HQ675730 |
|                    |    | AAA001-E03 | HQ675735 |
|                    |    | AAA001-E10 | HQ675736 |
|                    |    | AAA001-G21 | HQ675737 |
|                    |    | AAA001-I18 | HQ675739 |
|                    |    | AAA001-J20 | HQ675741 |
|                    |    | AAA003-E23 | HQ675745 |
|                    |    | AAA003-G11 | HQ675747 |
|                    |    | AAA003-G15 | HQ675748 |
|                    |    | AAA003-I10 | HQ675750 |
|                    |    | AAA003-I22 | HQ675751 |
|                    |    | AAA003-J10 | HQ675752 |
|                    |    | AAA003-O08 | HQ675754 |
|                    |    | AAA007-C17 | HQ675758 |
|                    |    | AAA007-E15 | HQ675760 |
|                    |    | AAA007-E18 | HQ675761 |
|                    |    | AAA007-L04 | HQ675765 |
|                    |    | AAA007-N15 | HQ675768 |
|                    |    | AAA007-N19 | HQ675769 |
|                    |    | AAA007-N23 | HQ675770 |
|                    |    | AAA007-O23 | HQ675772 |
|                    |    | AAA008-A08 | HQ675773 |
|                    |    | AAA008-B15 | HQ675775 |
|                    |    | AAA008-C15 | HQ675776 |
|                    |    | AAA008-E02 | HQ675777 |
|                    |    | AAA008-E15 | HQ675859 |
|                    |    | AAA008-E18 | HQ675780 |

|                    |     |                   |          |
|--------------------|-----|-------------------|----------|
|                    |     | AAA008-G03        | HQ675782 |
|                    |     | AAA008-K07        | HQ675786 |
|                    |     | AAA008-K16        | HQ675789 |
|                    |     | AAA008-M23        | HQ675792 |
|                    |     | <b>AAA008-N07</b> | HQ675793 |
|                    |     | AAA008-O05        | HQ675796 |
|                    |     | AAA008-O18        | HQ675797 |
|                    |     | AAA008-P02        | HQ675798 |
|                    |     | AAA008-P03        | HQ675799 |
| HOT                |     | AAA240-O10        | HQ675802 |
|                    |     | AAA288-B07        | HQ675807 |
|                    |     | AAA288-C14        | HQ675811 |
|                    |     | AAA288-D10        | HQ675817 |
|                    |     | AAA288-D18        | HQ675820 |
|                    |     | AAA288-D22        | HQ675821 |
|                    |     | AAA288-E03        | HQ675822 |
|                    |     | AAA288-E09        | HQ675824 |
|                    |     | AAA288-E15        | HQ675825 |
|                    |     | <b>AAA288-F11</b> | HQ675827 |
|                    |     | AAA288-G02        | HQ675829 |
|                    |     | AAA288-G05        | HQ675831 |
|                    |     | AAA288-I14        | HQ675835 |
|                    |     | AAA288-J07        | HQ675837 |
|                    |     | AAA288-J11        | HQ675838 |
|                    |     | AAA288-J14        | HQ675839 |
|                    |     | AAA288-K09        | HQ675843 |
|                    |     | AAA288-M04        | HQ675845 |
|                    |     | AAA288-M23        | HQ675846 |
|                    |     | AAA288-N15        | HQ675849 |
|                    |     | AAA288-N23        | HQ675850 |
|                    |     | AAA288-O07        | HQ675851 |
| <hr/>              |     |                   |          |
| <b>Phylotype-8</b> | SA  | AAA008-E17        | HQ675779 |
|                    | HOT | <b>AAA288-C05</b> | HQ675809 |
|                    |     | AAA288-D11        | HQ675818 |
|                    |     | AAA288-F20        | HQ675828 |
|                    |     | AAA288-O17        | HQ675852 |
| <hr/>              |     |                   |          |
| <b>Phylotype-9</b> | SA  | <b>AAA008-G11</b> | HQ675783 |

<sup>1</sup>HOT, North Pacific station ALOHA; SA, South Atlantic.

<sup>2</sup>Sequences in bold were chosen as the representative sequence(s) in the SSU rRNA tree.
