# Supplementary material for: Genomic and Metabolic Diversity of Marine Group I Thaumarchaeota in the Mesopelagic of Two Subtropical Gyres
Source: PubMed Central journal article supplement (PMC3990693; doi:10.1371/journal.pone.0095380), 2014-04-17
Supplement: pone.0095380.s006.pdf [file pone.0095380.s006.pdf]

**Table S3.** Sequencing and assembly characteristics of Marine Group I (MGI) Thaumarchaeota single amplified genomes (SAGs).

| SAG <sup>1</sup>  | IMG Taxon ID | Station        | Assembly size (Mbp) | No. of contigs | % Genome recovery <sup>2</sup> | Estimated genome size (Mbp) | No. protein coding genes <sup>3</sup> | %GC   |
|-------------------|--------------|----------------|---------------------|----------------|--------------------------------|-----------------------------|---------------------------------------|-------|
| <b>AAA001-A19</b> | 2513237067   | South Atlantic | 0.76                | 223            | 33.0                           | 2.30                        | 891                                   | 35.7  |
| <b>AAA007-N19</b> | 2513237068   |                | 0.89                | 194            | 73.4                           | 1.21                        | 1098                                  | 35.6  |
| <b>AAA007-O23</b> | 2527291500   |                | 1.10                | 32             | 94.7                           | 1.17                        | 1354                                  | 35.7  |
| AAA007-C21        | 2524023106   |                | 0.15                | 24             | 20.2                           | 0.72                        | 265                                   | 34.9  |
| AAA007-E02        | 2524023111   |                | 0.31                | 43             | 31.9                           | 0.96                        | 559                                   | 35.3  |
| AAA007-E15        | 2524023107   |                | 0.26                | 29             | 23.4                           | 1.12                        | 468                                   | 35.1  |
| AAA007-G17        | 2524023108   |                | 0.20                | 31             | 7.5                            | 2.73                        | 373                                   | 35.9  |
| AAA007-M20        | 2524023109   |                | 0.11                | 27             | 7.5                            | 1.44                        | 231                                   | 35.4  |
| AAA007-N23        | 2524023110   |                | 0.08                | 17             | 3.2                            | 2.54                        | 155                                   | 35.1  |
| AAA008-E15        | 2524023112   |                | 0.28                | 33             | 26.6                           | 1.05                        | 485                                   | 35.1  |
| AAA008-E17        | 2524023113   |                | 0.22                | 25             | 9.6                            | 2.27                        | 374                                   | 35.4  |
| AAA008-G03        | 2524023114   |                | 0.36                | 44             | 36.2                           | 1.01                        | 660                                   | 35.2  |
| AAA008-M21        | 2524023115   |                | 0.20                | 18             | 13.8                           | 1.44                        | 353                                   | 33.6  |
| AAA008-M23        | 2524023116   |                | 0.23                | 20             | 12.8                           | 1.77                        | 370                                   | 35.2  |
| AAA008-N07        | 2524023117   |                | 0.16                | 20             | 9.6                            | 1.69                        | 293                                   | 36.5  |
| AAA008-O05        | 2524023118   |                | 0.24                | 24             | 28.7                           | 0.84                        | 423                                   | 35.6  |
| AAA008-O18        | 2524023119   |                | 0.21                | 36             | 22.3                           | 0.93                        | 417                                   | 34.1  |
| AAA008-P02        | 2524023120   |                | 0.30                | 45             | 25.5                           | 1.18                        | 574                                   | 35.7  |
| AAA008-P23        | 2524023121   |                | 0.33                | 48             | 24.5                           | 1.35                        | 615                                   | 34.7  |
| <b>AAA288-I14</b> | 2513237066   | North Pacific  | 1.06                | 150            | 78.7                           | 1.35                        | 1404                                  | 35.3  |
| <b>AAA288-J14</b> | 2513237065   |                | 0.68                | 253            | 55.3                           | 1.23                        | 796                                   | 35.8  |
| AAA288-C17        | 2524023122   |                | 0.39                | 51             | 27.7                           | 1.39                        | 681                                   | 34.9  |
| AAA288-D03        | 2524023123   |                | 0.26                | 42             | 11.7                           | 2.26                        | 518                                   | 34.6  |
| AAA288-D22        | 2524023124   |                | 0.39                | 46             | 42.6                           | 0.92                        | 704                                   | 35.2  |
| AAA288-E09        | 2524023125   |                | 0.31                | 46             | 27.7                           | 1.13                        | 547                                   | 35.3  |
| AAA288-G05        | 2524023126   |                | 0.55                | 49             | 37.2                           | 1.47                        | 926                                   | 35.7  |
| AAA288-K02        | 2524023127   |                | 0.43                | 70             | 31.9                           | 1.36                        | 761                                   | 35.6  |
| AAA288-K05        | 2524023128   |                | 0.29                | 35             | 27.7                           | 1.04                        | 487                                   | 35.4  |
| AAA288-K20        | 2524023097   |                | 0.37                | 54             | 24.5                           | 1.52                        | 685                                   | 35.5  |
| AAA288-M04        | 2524023098   |                | 0.32                | 49             | 25.5                           | 1.25                        | 608                                   | 35.6  |
| AAA288-M23        | 2524023099   |                | 0.28                | 48             | 20.2                           | 1.39                        | 529                                   | 34.5  |
| AAA288-N15        | 2524023100   |                | 0.14                | 27             | 17.0                           | 0.85                        | 300                                   | 35.3  |
| AAA288-N23        | 2524023101   |                | 0.31                | 39             | 27.7                           | 1.12                        | 539                                   | 34.3  |
| AAA288-O17        | 2524023102   |                | 0.03                | 9              | 2.1                            | 1.55                        | 80                                    | 34.5  |
| AAA288-O22        | 2524023103   |                | 0.25                | 38             | 17.0                           | 1.48                        | 466                                   | 34.33 |
| AAA288-P02        | 2524023104   |                | 0.65                | 58             | 34.0                           | 1.91                        | 1069                                  | 35.06 |
| AAA288-P18        | 2524023105   |                | 0.43                | 73             | 39.4                           | 1.10                        | 793                                   | 35.68 |

<sup>1</sup>SAGs in bold are genomes with larger assembly sizes; all other SAGs were derived from Nextera-prepared sequence libraries and had smaller genome assembly sizes.

<sup>2</sup>Genome recovery estimates based on 94 conserved single copy genes (CSCG) present within 98% of 155 archaeal genomes from IMG.

<sup>3</sup>Number of protein coding sequences determined after removing contigs <2 kbp.
