# Supplementary material for: Genomic and Metabolic Diversity of Marine Group I Thaumarchaeota in the Mesopelagic of Two Subtropical Gyres
Source: PubMed Central journal article supplement (PMC3990693; doi:10.1371/journal.pone.0095380), 2014-04-17
Supplement: pone.0095380.s008.pdf [file pone.0095380.s008.pdf]

**Table S5.** Genes for aerobic oxidation of ammonia identified in Marine Group I (MGI) Thaumarchaeota single amplified genomes (SAGs).

| <b>Enzyme</b>                                      | AAA001-A19 | AAA007-N19 | AAA007-O23 | AAA288-I14 | AAA288-J14 |
|----------------------------------------------------|------------|------------|------------|------------|------------|
| Ammonia monooxygenase, subunit A (1.14.99.39)      |            | •          | •          | •          | •          |
| Ammonia monooxygenase, subunit B                   |            | •          | •          | •          | •          |
| Ammonia monooxygenase, subunit C                   | •          | •          | •          |            | •          |
| Ubiquinol-cytochrome c reductase (1.10.2.2)        | •          | •          | •          |            | •          |
| Ammonia permease                                   | •          | •          |            |            |            |
| Copper-containing nitrite reductase (1.7.2.1)      | •          | •          | •          | •          | •          |
| Copper cytochrome c oxidase (1.9.3.1)              |            | •          | •          | •          | •          |
| NADH-quinone oxidoreductase                        | •          |            | •          |            | •          |
| Copper binding protein, plastocyanin/azurin family | 1          | 3          | 4          | 3          | 1          |
| Multicopper oxidase                                | 2          | 1          | 2          | 2          | 1          |
