# Supplementary material for: Genomic and Metabolic Diversity of Marine Group I Thaumarchaeota in the Mesopelagic of Two Subtropical Gyres
Source: PubMed Central journal article supplement (PMC3990693; doi:10.1371/journal.pone.0095380), 2014-04-17
Supplement: pone.0095380.s009.pdf [file pone.0095380.s009.pdf]

**Table S6.** Central metabolism genes identified in Marine Group I (MGI) Thaumarchaeota single amplified genomes (SAGs). Genes in red were also not identified in *Nitrosopumilus maritimus*.

| Enzyme/Pathway                                                       | AAA001-A19 | AAA007-N19 | AAA007-O23 | AAA288-I14 | AAA288-J14 |
|----------------------------------------------------------------------|------------|------------|------------|------------|------------|
| <b>3-Hydroxypropionate/4-Hydroxybutyrate Cycle</b>                   |            |            |            |            |            |
| Acetyl-CoA carboxylase (6.4.1.2/6.3.4.14)                            | •          |            | •          |            | •          |
| Malonyl-CoA reductase (1.2.1.75)                                     |            |            |            |            |            |
| Malonate semialdehyde reductase (1.1.1.298)                          |            |            |            |            |            |
| 3-Hydroxypropionyl-CoA synthetase (6.2.1.36)                         |            |            |            |            |            |
| 3-Hydroxypropionyl-CoA dehydratase (4.2.1.116)                       |            |            |            |            |            |
| Acryloyl-CoA reductase (1.3.1.84)                                    |            |            |            |            |            |
| Propionyl-CoA carboxylase (6.4.1.3)                                  | •          |            | •          |            | •          |
| Methylmalonyl-CoA epimerase (5.1.99.1)                               | •          | •          | •          | •          |            |
| Methylmalonyl-CoA mutase (5.4.99.2)                                  | •          | •          | •          | •          |            |
| Succinyl-CoA reductase (1.2.1.76)                                    |            |            |            |            |            |
| Succinate semialdehyde reductase (1.1.1.-)                           | •          | •          | •          | •          |            |
| 4-Hydroxybutyryl-CoA synthetase (6.2.1.-)                            | •          | •          | •          | •          | •          |
| 4-Hydroxybutyryl-CoA dehydratase (42.1.120/5.3.3.3)                  | •          | •          | •          | •          | •          |
| Crotonyl-CoA hydratase (4.2.1.-)                                     |            | •          | •          | •          | •          |
| 3-Hydroxybutyryl-CoA dehydratase (42.1.55/1.1.1.35)                  | •          | •          | •          | •          | •          |
| Acetoacetyl-CoA $\beta$ -ketothiolase (2.3.1.9)                      | •          | •          | •          | •          | •          |
| <b>Citric Acid Cycle (TCA)</b>                                       |            |            |            |            |            |
| citrate synthase (2.3.3.1)                                           |            | •          | •          | •          |            |
| citrate lyase (beta subunit)/citryl-CoA lyase (4.1.3.6)              | •          |            | •          | •          |            |
| aconitate hydratase (4.2.1.3)                                        |            |            | •          | •          |            |
| isocitrate dehydrogenase (1.1.1.42)                                  |            | •          | •          |            |            |
| oxoglutarate ferredoxin oxidoreductase (1.2.7.3)                     |            | •          | •          | •          |            |
| succinyl CoA-synthetase (6.2.1.5)                                    | •          | •          | •          | •          |            |
| succinate dehydrogenase (1.3.99.1)                                   |            | •          | •          | •          | •          |
| fumarate hydratase (4.2.1.2)                                         | •          | •          | •          |            | •          |
| malate dehydrogenase (1.1.1.37)                                      |            | •          |            | •          | •          |
| <b>Glycolysis/Embden–Meyerhof–Parnas (EMP)</b>                       |            |            |            |            |            |
| glucokinase (2.7.1.2)                                                |            |            |            |            |            |
| glucose-6-phosphate isomerase/aldose 1-epimerase (5.3.1.9 / 5.1.3.3) |            | •          | •          |            |            |
| 6-phosphofructokinase (2.7.1.11)                                     |            |            |            |            |            |
| fructose 1,6-bisphosphate aldolase (4.1.2.13)                        | •          |            | •          | •          | •          |
| triosephosphate isomerase (5.3.1.1)                                  | •          | •          |            | •          |            |
| glyceraldehyde-3-phosphate dehydrogenase (1.2.1.12)                  |            |            |            | •          |            |
| phosphoglycerate kinase (2.7.2.3)                                    |            | •          |            |            |            |
| phosphoglycerate mutase (5.4.2.1)                                    |            | •          |            | •          | •          |
| enolase (4.2.1.11)                                                   |            | •          |            |            | •          |
| pyruvate kinase (2.7.1.40)                                           |            |            |            |            |            |
| <b>Pentose Phosphate Pathway</b>                                     |            |            |            |            |            |
| glucose-6-phosphate dehydrogenase (1.1.1.49)                         |            |            |            |            |            |
| 6-phosphogluconolactonase (3.1.1.31)                                 |            |            |            |            |            |
| 6-phosphogluconate dehydrogenase (1.1.1.44)                          |            |            |            |            |            |
| ribulose-phosphate 3-epimerase (5.1.3.1)                             |            |            |            |            |            |
| ribose-5-phosphate isomerase (5.3.1.6)                               | •          | •          | •          | •          | •          |
| transketolase (2.2.1.1)                                              | •          | •          | •          | •          | •          |
| transaldolase (2.2.1.2)                                              |            | •          | •          | •          | •          |
