# Supplementary material for: Genomic and Metabolic Diversity of Marine Group I Thaumarchaeota in the Mesopelagic of Two Subtropical Gyres
Source: PLoS One. 2014 Apr 17;9(4):e95380. doi: 10.1371/journal.pone.0095380 (PMC3990693; doi:10.1371/journal.pone.0095380)
Supplement: Table S4 — (PDF) [file pone.0095380.s007.pdf]

**Table S4.** Metagenomes used in the fragment recruitment analysis of Marine Group I (MGI) Thaumarchaeota single amplified genomes (SAGs), and marine isolates *Cenarchaeum symbiosum* and *Nitrosopumilus maritimus*.

| File Name <sup>1</sup> | Location                | Date     | Latitude   | Longitude   | Depth (m) | No. of seqs <sup>2</sup> | Library Type |
|------------------------|-------------------------|----------|------------|-------------|-----------|--------------------------|--------------|
| HF10_Small             | HOT (station ALOHA)     | 10/07/02 | 22.750000  | -158.000000 | 10        | 7,829                    | Sanger       |
| HF70_Small             |                         | 10/07/02 | 22.750000  | -158.000000 | 79        | 10,979                   | Sanger       |
| HF130_Small            |                         | 10/06/02 | 22.750000  | -158.000000 | 130       | 6,754                    | Sanger       |
| HF200_Small            |                         | 10/06/02 | 22.750000  | -158.000000 | 200       | 8,241                    | Sanger       |
| HF500_Small            |                         | 10/06/02 | 22.750000  | -158.000000 | 500       | 9,004                    | Sanger       |
| HF770_Small            |                         | 12/21/03 | 22.750000  | -158.000000 | 770       | 11,474                   | Sanger       |
| HF4000_Small           |                         | 12/21/03 | 22.750000  | -158.000000 | 4,000     | 11,213                   | Sanger       |
| HF4000_Large           |                         | 12/21/03 | 22.750000  | -158.000000 | 4,000     | 13,395                   | Sanger       |
| HOT186_25m             |                         | 10/19/06 | 22.750000  | -158.000000 | 25        | 516,241                  | 454 GS FLX   |
| HOT186_75m             |                         | 10/19/06 | 22.750000  | -158.000000 | 75        | 558,827                  | 454 GS FLX   |
| HOT186_110m            |                         | 10/19/06 | 22.750000  | -158.000000 | 110       | 407,101                  | 454 GS FLX   |
| HOT186_500m            |                         | 10/19/06 | 22.750000  | -158.000000 | 500       | 835,910                  | 454 GS FLX   |
| HOT215_25m             |                         | 09/09/09 | 22.750000  | -158.000000 | 25        | 943,226                  | 454 Ti FLX   |
| HOT215_500m            |                         | 09/09/09 | 22.750000  | -158.000000 | 500       | 1,142,919                | 454 Ti FLX   |
| HOT215_770m            |                         | 09/09/09 | 22.750000  | -158.000000 | 770       | 1,173,678                | 454 Ti FLX   |
| HOT215_1000m           |                         | 09/09/09 | 22.750000  | -158.000000 | 1,000     | 1,225,938                | 454 Ti FLX   |
| j4_10                  | NESAP LineP             | 06/08/09 | 48.650000  | -126.666667 | 10        | 13,302                   | Sanger       |
| j4_500                 |                         |          | 48.650000  | -126.666667 | 500       | 10,587                   | Sanger       |
| j4_1000                |                         |          | 48.650000  | -126.666667 | 1,000     | 12,308                   | Sanger       |
| j4_1300                |                         |          | 48.650000  | -126.666667 | 1,300     | 9,175                    | Sanger       |
| j12_10                 |                         | 06/09/09 | 48.970000  | -130.666667 | 10        | 11,473                   | Sanger       |
| j12_500                |                         |          | 48.970000  | -130.666667 | 500       | 10,781                   | Sanger       |
| j12_1000               |                         |          | 48.970000  | -130.666667 | 1,000     | 13,080                   | Sanger       |
| j12_2000               |                         |          | 48.970000  | -130.666667 | 2,000     | 6,330                    | Sanger       |
| j26_10                 |                         | 06/24/09 | 50.000000  | -145.000000 | 10        | 10,065                   | Sanger       |
| j26_500                |                         |          | 50.000000  | -145.000000 | 500       | 18,030                   | Sanger       |
| j26_1000               |                         |          | 50.000000  | -145.000000 | 1,000     | 11,669                   | Sanger       |
| j26_2000               |                         |          | 50.000000  | -145.000000 | 2,000     | 12,333                   | Sanger       |
| a4_10                  |                         | 08/21/09 | 48.650000  | -126.666667 | 10        | 12,055                   | Sanger       |
| a4_500                 |                         |          | 48.650000  | -126.666667 | 500       | 15,302                   | Sanger       |
| a4_1000                |                         |          | 48.650000  | -126.666667 | 1,000     | 13,776                   | Sanger       |
| a4_1300                |                         |          | 48.650000  | -126.666667 | 1,300     | 9,649                    | Sanger       |
| a12_10                 |                         | 08/23/09 | 48.970000  | -130.666667 | 10        | 11,107                   | Sanger       |
| a12_500                |                         |          | 48.970000  | -130.666667 | 500       | 9,924                    | Sanger       |
| a12_1000               |                         |          | 48.970000  | -130.666667 | 1,000     | 11,929                   | Sanger       |
| a12_2000               |                         |          | 48.970000  | -130.666667 | 2,000     | 12,916                   | Sanger       |
| a26_10                 |                         | 08/27/09 | 50.000000  | -145.000000 | 10        | 10,125                   | Sanger       |
| a26_500                |                         |          | 50.000000  | -145.000000 | 500       | 8,917                    | Sanger       |
| a26_1000               |                         |          | 50.000000  | -145.000000 | 1,000     | 7,267                    | Sanger       |
| f40010                 |                         | 02/04/10 | 48.650000  | -126.666667 | 10        | 13,996                   | Sanger       |
| f40500                 |                         |          | 48.650000  | -126.666667 | 500       | 14,295                   | Sanger       |
| f41000                 |                         |          | 48.650000  | -126.666667 | 1,000     | 14,573                   | Sanger       |
| f41300                 |                         |          | 48.650000  | -126.666667 | 1,300     | 14,513                   | Sanger       |
| f12010                 |                         | 02/06/10 | 48.970000  | -130.666667 | 10        | 14,237                   | Sanger       |
| f12200                 |                         |          | 48.970000  | -130.666667 | 200       | 14,633                   | Sanger       |
| f12500                 |                         |          | 48.970000  | -130.666667 | 500       | 14,656                   | Sanger       |
| GB                     | Guaymas Basin, Plume 1  | 07/18/04 | 27.018167  | -111.417667 | 1,996     | 497,180                  | 454 Ti FLX   |
| GB                     | Guaymas Basin, Plume 2  | 07/11/04 | 27.016667  | -111.415500 | 1,775     | 463,130                  | 454 Ti FLX   |
| SRR304684              | ETSP (OMZ; Stn. #3)     | 06/16/08 | -20.116667 | -70.383333  | 15        | 451,356                  | 454 GS FLX   |
| SRR304656              |                         | 06/16/08 | -20.116667 | -70.383333  | 65        | 337,971                  | 454 GS FLX   |
| SRR304668              |                         | 06/16/08 | -20.116667 | -70.383333  | 500       | 455,219                  | 454 GS FLX   |
| SRR304683              |                         | 06/16/08 | -20.116667 | -70.383333  | 800       | 137,427                  | 454 GS FLX   |
| SRR064444              |                         | 06/16/08 | -20.116667 | -70.383333  | 50        | 307,278                  | 454 GS FLX   |
| SRR064446              |                         | 06/16/08 | -20.116667 | -70.383333  | 85        | 518,412                  | 454 GS FLX   |
| SRR064448              |                         | 06/16/08 | -20.116667 | -70.383333  | 110       | 328,380                  | 454 GS FLX   |
| SRR064450              |                         | 06/16/08 | -20.116667 | -70.383333  | 200       | 434,546                  | 454 GS FLX   |
| SA                     | South Atlantic Gyre     | 11/27/07 | -12.494833 | -4.998667   | 800       | 404,457                  | 454 Ti FLX   |
| KM3                    | Ionian Sea, Station KM3 | 11/17/04 | 36.510556  | 15.676944   | 3,000     | 9,091                    | Sanger       |

<sup>1</sup>Metagenomes from the same depth were combined for plotting of abundances in Figure 2.

<sup>2</sup>Number of sequences used after quality trimming and processing.
