# Supplementary material for: Genomic and Metabolic Diversity of Marine Group I Thaumarchaeota in the Mesopelagic of Two Subtropical Gyres
Source: PLoS One. 2014 Apr 17;9(4):e95380. doi: 10.1371/journal.pone.0095380 (PMC3990693; doi:10.1371/journal.pone.0095380)
Supplement: Table S7 — (PDF) [file pone.0095380.s010.pdf]

**Table S7.** Transporter genes identified in Marine Group I (MGI) Thaumarchaeota single amplified genomes (SAGs).

| Transporter/Type                                       | AAA001-A19 | AAA007-N19 | AAA007-O23 | AAA288-I14 | AAA288-J14 |
|--------------------------------------------------------|------------|------------|------------|------------|------------|
| <b>ABC Transporters</b>                                |            |            |            |            |            |
| <i>Mineral and Organic Ion</i>                         |            |            |            |            |            |
| Iron (III) transport system substrate biding protein   |            |            |            |            | ●          |
| <i>Phosphate and Amino Acid</i>                        |            |            |            |            |            |
| Phosphonate transport system substrate-binding protein | ●          |            | ●          | ●          |            |
| Phosphonate transport system permease protein          | ●          | ●          | ●          |            |            |
| Phosphonate transport system ATP-binding protein       |            |            | ●          |            |            |
| <i>Oligosaccharide and Polyol Transporters</i>         |            |            |            |            |            |
| Multiple sugar transport system permease protein       |            |            |            |            | ●          |
| <i>ABC-type 2 and other Transporters</i>               |            |            |            |            |            |
| Antibiotic transport system permease protein           | ●          |            | ●          | ●          | ●          |
| Antibiotic transport system ATP-binding protein        | ●          |            | ●          | ●          |            |
| Lipoprotein-releasing system permease protein          |            | ●          |            | ●          |            |
| Lipoprotein-releasing system ATP-binding protein       |            | ●          |            | ●          |            |
| <i>Metal Cation, Iron Siderophore and Vitamin B12</i>  |            |            |            |            |            |
| Zinc transport system permease protein                 | ●          |            | ●          | ●          |            |
| Zinc transport system ATP-binding protein              | ●          |            | ●          | ●          |            |
